# Supplementary material
Source: PubMed Central journal article supplement (PMC7676990)
Supplement: supp_8.4.E715_2019-0185-1-at.pdf [file supp_8.4.E715_2019-0185-1-at.pdf]

## **Appendix 1 (as supplied by the authors): Canadian Trauma Centres invited to participate in TraumaRECON**

- Vancouver General Hospital, Vancouver / University of British Columbia
- Royal Columbian Hospital, New Westminster / University of British Columbia
- Foothills Medical Centre, Calgary / University of Calgary
- WC Mackenzie Health Sciences Centre, Edmonton / University of Alberta
- Royal Alexandra Hospital, Edmonton / University of Alberta
- Saskatoon General Hospital, Saskatoon / University of Saskatchewan
- Regina General Hospital, Regina / University of Saskatchewan
- Winnipeg Health Sciences Centre, Winnipeg / University of Manitoba
- Thunder Bay Regional Health Sciences Centre, Thunder Bay / Northern Ontario School of Medicine
- Health Sciences North, Sudbury / Northern Ontario School of Medicine
- London Health Sciences Centre, London / Western University
- Hamilton Health Sciences Centre, Hamilton / McMaster University
- The Ottawa Hospital, Civic Campus, Ottawa / University of Ottawa
- Sunnybrook Health Sciences Centre, Toronto / University of Toronto
- St. Michael's Hospital, Toronto / University of Toronto
- Kingston General Hospital, Kingston / Queen's University
- Montreal General Hospital / McGill University
- Centre Hospitalier de l'Université de Montreal (CHUM), Montreal / Université de Montreal
- Centre Hospitalier Universitaire de Sherbrooke, Sherbrooke / Université de Sherbrooke
- Centre hospitalier universitaire de Québec (CHUQ), Quebec City / Université Laval
- QEII Health Sciences Centre, Halifax / Dalhousie University
- Health Sciences Centre – General Hospital, St. John's / Memorial University of Newfoundland
