# Supplementary material
Source: PubMed Central journal article supplement (PMC7676990)
Supplement: supp_8.4.E715_spirit-checklist.pdf [file supp_8.4.E715_spirit-checklist.pdf]

October 30, 2019

Dr. Diane Kelsall and colleagues  
Editor-in-Chief  
CMAJ Open

**RE: Trauma Resident Exposure in Canada and Operative Numbers (TraumaRECON): a study protocol for a national multicentre study of operative, non-operative, and structured educational exposures in Canada**

Dear Dr. Diane Kelsall and colleagues,

The following is our reporting guideline checklist (relevant recommendations as per SPIRIT 2013 Checklist):

**Administrative information**

Title: page 1  
Funding and financial declarations: page 1  
Author roles and responsibilities: page 1

**Introduction**

Background and rationale: page 3  
Objectives: page 3

**Methods: Participants, interventions, and outcomes**

Trial design: page 3  
Study setting: page 3  
Eligibility criteria: pages 3-4  
Participant timeline: page 4  
Sample size: page 5  
Recruitment: page 3

**Methods: Data collection, management, and analysis**

Data collection methods: pages 5-7  
Data management: pages 7-8  
Statistical methods: page 8

**Ethics and dissemination**

Research ethics approval: page 8  
Confidentiality: pages 6-8  
Declarations of interests: page 1  
Access to data: pages 3-4, 6  
Dissemination policy: pages 4, 6

Yours Sincerely,

Timothy J. Rice, MD FRCSC

*Correspondence to:*  
Dr. Tim Rice  
Hamilton General Hospital  
6 North Wing, Room 615  
Hamilton Ontario L8L 2X2  
CANADA  
Office: +1 (905) 521-2100 ext.44520  
Fax: +1 (905) 577-1486  
Email: [ricet@hhsc.ca](mailto:ricet@hhsc.ca)
